# Supplementary material for: Mechanistic investigation of photocatalytic degradation of organic dyes by a novel zinc coordination polymer
Source: Royal Society of Chemistry journal article supplement (doi:10.1039/c9ra07821e), 2019-01-01
Supplement: c9ra07821e1.pdf [file c9ra07821e1.pdf]

## Supporting Information

### **Mechanistic investigation of photocatalytic degradation of organic dyes by a novel zinc coordination polymer**

Jianqiang Huo,<sup>†,\*</sup> Donghui Yu,<sup>†</sup> Haiqiang Li,<sup>†</sup> Bingcai Luo,<sup>†</sup> Navamoney Arulsamy<sup>‡</sup>

*<sup>†</sup>College of Chemistry and Chemical Engineering,*

*Key Laboratory of Eco-functional Polymer Materials of the Ministry of Education,*

*Key Laboratory of Eco-environmental Polymer Materials of Gansu Province*

*Northwest Normal University, Lanzhou 730070, China*

*<sup>‡</sup>Department of Chemistry, 1000 E. University AVE, University of Wyoming, Laramie,*

*WY 82071-2000, USA*

\*Corresponding author: Jianqiang Huo

*E-mail: huojianqiang@hotmail.com*

## List of Contents:

---

|                                                                                                                                                                                                                      |          |
|----------------------------------------------------------------------------------------------------------------------------------------------------------------------------------------------------------------------|----------|
| <b>Table S1.</b> Summary of Crystallographic Data and Refinement Parameters for $\{[\text{Zn}(\text{TIPA})(\text{seb})_{0.5}](\text{NO}_3) \cdot 3.5\text{H}_2\text{O}\}_n$ ( <b>1</b> ).                            | Page 4   |
| <b>Table S2.</b> Selected Bond Distances and Angles for <b>1</b>                                                                                                                                                     | Page 5   |
| <b>Figure S1.</b> Photocatalytic degradation of RHb (a), crystal violet (b), fuchsin basic (c) and MO (d) by compound <b>1</b> .                                                                                     | Page 6-7 |
| <b>Figure S2.</b> The TGA curves of compound <b>1</b> .                                                                                                                                                              | Page 8   |
| <b>Figure S3.</b> The FT-IR spectrogram of compound <b>1</b> .                                                                                                                                                       | Page 8   |
| <b>Figure S4.</b> UV-vis absorption spectra of the supernatant solution remaining after $\text{MnO}_4^-$ adsorption at various time intervals.                                                                       | Page 9   |
| <b>Figure S5.</b> (top) Photoluminescence spectra and (bottom) SV curve for suspensions <b>1</b> by gradual addition of NM. The inset: the quenching linearity relationship at low concentrations of NM.             | Page 10  |
| <b>Figure S6.</b> (top) Photoluminescence spectra of suspensions <b>1</b> introduced into various antibiotics. (bottom) Luminescence intensities after introduced into various antibiotics of suspensions <b>1</b> . | Page 11  |

**Figure S7.** (top) Photoluminescence spectra and (bottom) SV curve for compound **1** by gradual addition of OFX. The inset: the quenching linearity relationship at low concentrations of OFX.

Page 12

**Figure S8.** Experimental (black) and simulated (red) powder XRD patterns for **1**.

Page 13

**Figure S9.** SEM images of complex **1** in the scale of 2  $\mu\text{m}$  (a) and zoom in 200 nm (b), respectively.

Page 13

**Table S1.** Summary of crystallographic data and refinement parameters for  $\{[\text{Zn}(\text{TIPA})(\text{seb})_{0.5}](\text{NO}_3) \cdot 3.5\text{H}_2\text{O}\}_n$  (**1**).

|                                              |                                                               |
|----------------------------------------------|---------------------------------------------------------------|
| formula                                      | $\text{C}_{32}\text{H}_{36}\text{N}_8\text{O}_{8.5}\text{Zn}$ |
| space group                                  | $P2_1/n$                                                      |
| $a$ (Å)                                      | 11.9804(14)                                                   |
| $b$ (Å)                                      | 13.4380(2)                                                    |
| $c$ (Å)                                      | 21.061(2)                                                     |
| $\beta$ , °                                  | 97.313(11)                                                    |
| $V$ , (Å <sup>3</sup> )                      | 3363.0(6)                                                     |
| $Z$                                          | 4                                                             |
| $D_{\text{calc}}$ (g/cm <sup>3</sup> )       | 1.450                                                         |
| $\mu$ , mm <sup>-1</sup>                     | 0.795                                                         |
| $\theta$ range, °                            | 3.429 – 28.673                                                |
| data/parameters                              | 7602/380                                                      |
| goodness of fit                              | 0.957                                                         |
| $R_1/wR_2$ ( $I > 2\sigma(I)$ ) <sup>a</sup> | 0.0854/0.1655                                                 |
| $R_1/wR_2$ (all data) <sup>a</sup>           | 0.2105/0.2350                                                 |

$$^a R_1 = \frac{\sum ||F_o| - |F_c||}{\sum |F_o|}$$

$$wR_2 = \left\{ \frac{\sum [w(F_o^2 - F^2)^2]}{\sum [w(F_o^2)^2]} \right\}^{1/2} \text{ where } w = \frac{q}{\sigma^2(F_o^2)} + (a^*P)^2 + b^*P.$$

**Table S2.** Selected bond distances [ $\text{\AA}$ ] and bond angles ( $^\circ$ ) for  $\{[\text{Zn}(\text{TIPA})(\text{seb})_{0.5}](\text{NO}_3) \cdot 3.5\text{H}_2\text{O}\}_n$  (**1**).

|                        |           |                        |           |
|------------------------|-----------|------------------------|-----------|
| Zn(1)-O(1)             | 2.119(10) | Zn(1)-O(2)             | 2.473(9)  |
| Zn(1)-N(3)             | 2.023(5)  | Zn(1)-N(5)#1           | 2.015(6)  |
| Zn(1)-N(7)#2           | 2.020(5)  | Zn(1) $\cdots$ Zn(1)#3 | 13.529(2) |
| Zn(1) $\cdots$ Zn(1)#4 | 15.443(2) | Zn(1) $\cdots$ Zn(1)#1 | 15.516(2) |
| N(5)#1-Zn(1)-N(3)      | 109.6(2)  | N(5)#1-Zn(1)-N(7)#2    | 100.2(2)  |
| N(3)-Zn(1)-N(7)#2      | 104.5(2)  | N(5)#1-Zn(1)-O(1)      | 129.8(3)  |
| N(3)-Zn(1)-O(1)        | 93.5(3)   | N(7)#2-Zn(1)-O(1)      | 116.5(2)  |
| N(5)#1-Zn(1)-O(2)      | 91.8(3)   | N(3)-Zn(1)-O(2)        | 149.2(3)  |
| N(7)#2-Zn(1)-O(2)      | 92.6(3)   | O(1)-Zn(1)-O(2)        | 55.7(3)   |

Symmetry transformations used to generate equivalent atoms:

#1  $-x, -y+1, -z+1$     #2  $-x+1/2, y+1/2, -z+3/2$     #3  $-x-1, -y, -z+2$

#4  $-x+1/2, y-1/2, -z+3/2$

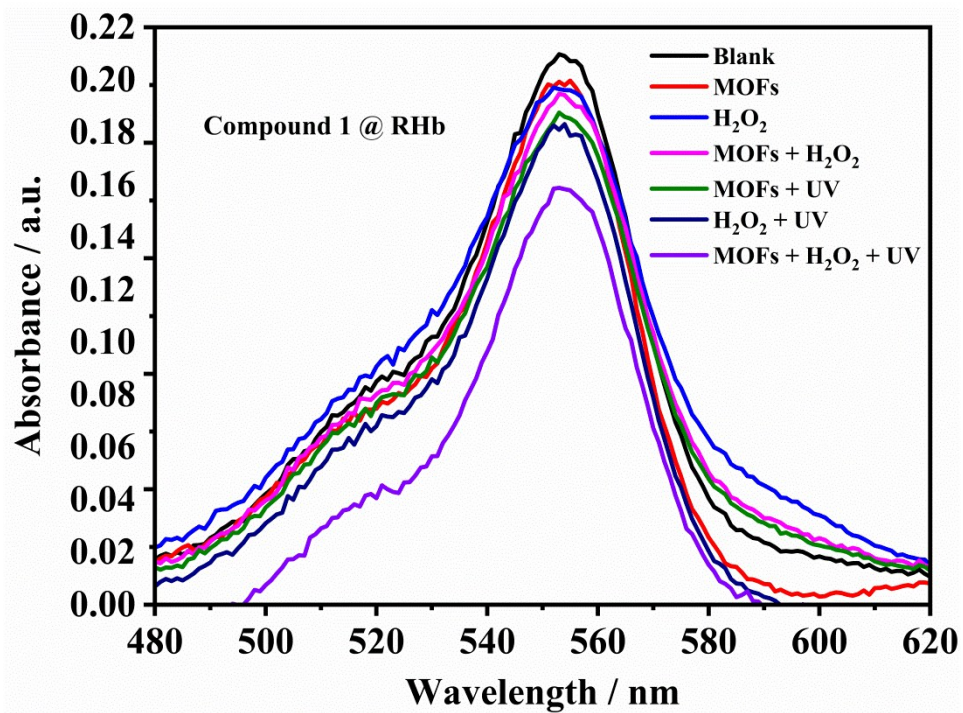

(a)

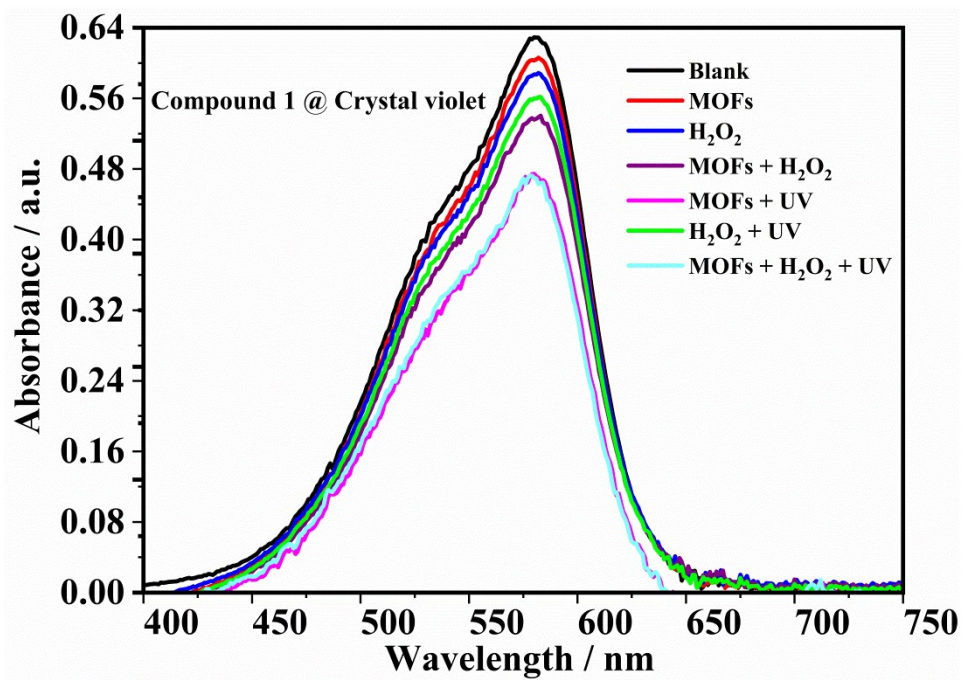

(b)

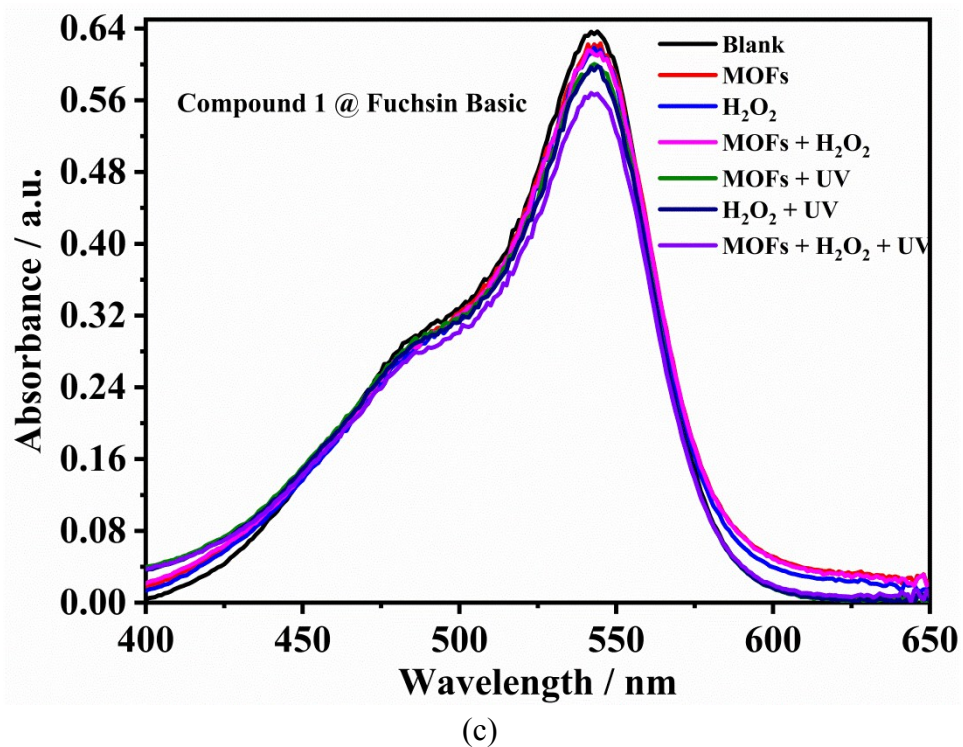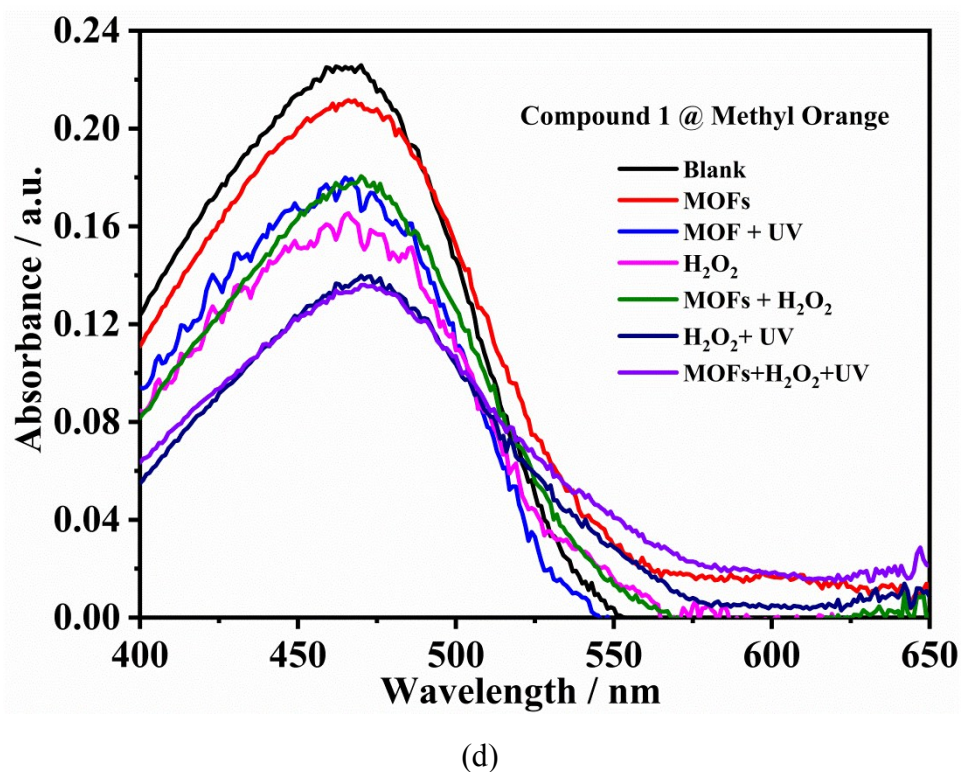

Figure S1. Photocatalytic degradation of RHB (a), crystal violet (b), fuchsin basic (c) and MO (d) by compound 1.

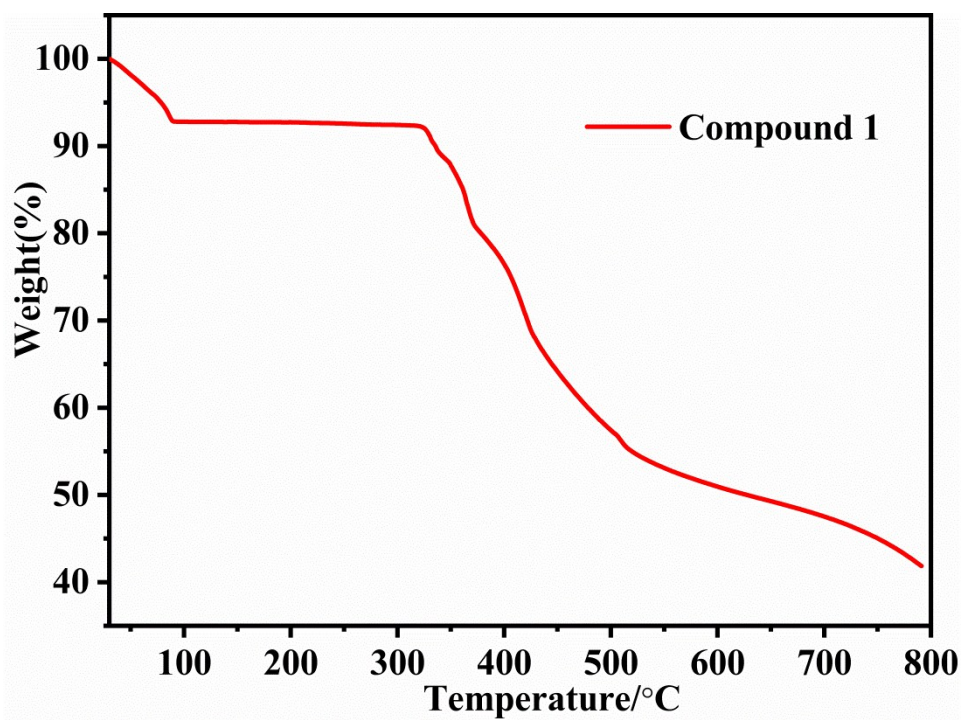

Figure S2. The TGA curves of compound 1.

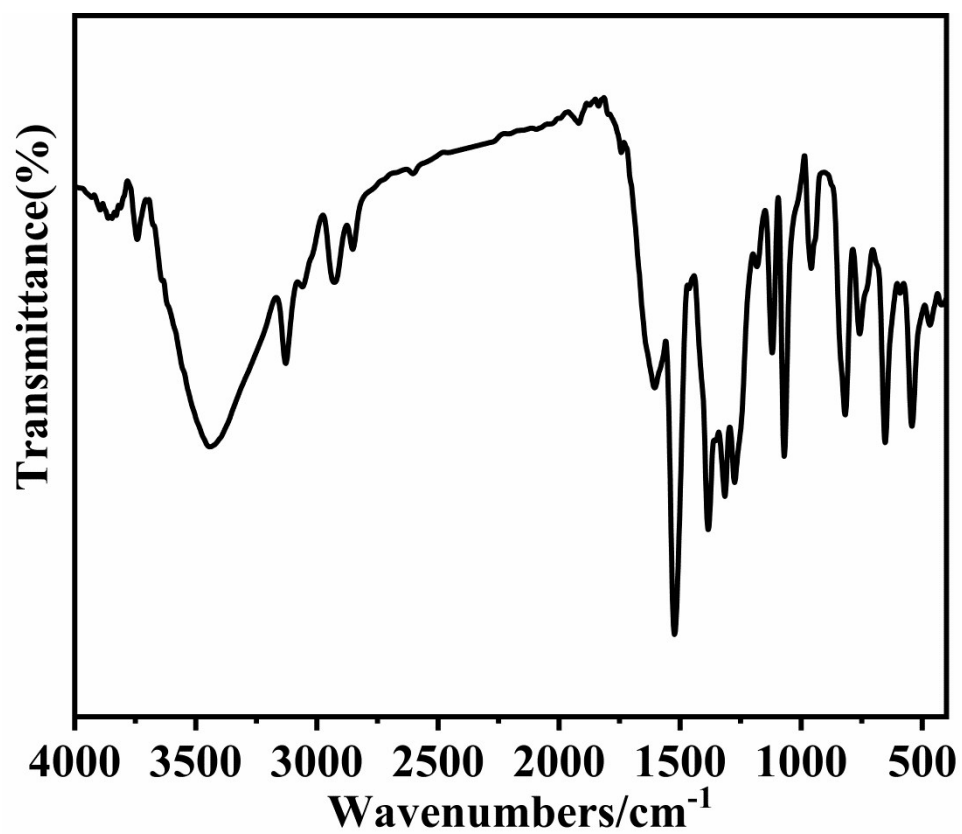

Figure S3. The FT-IR spectrogram of compound 1.



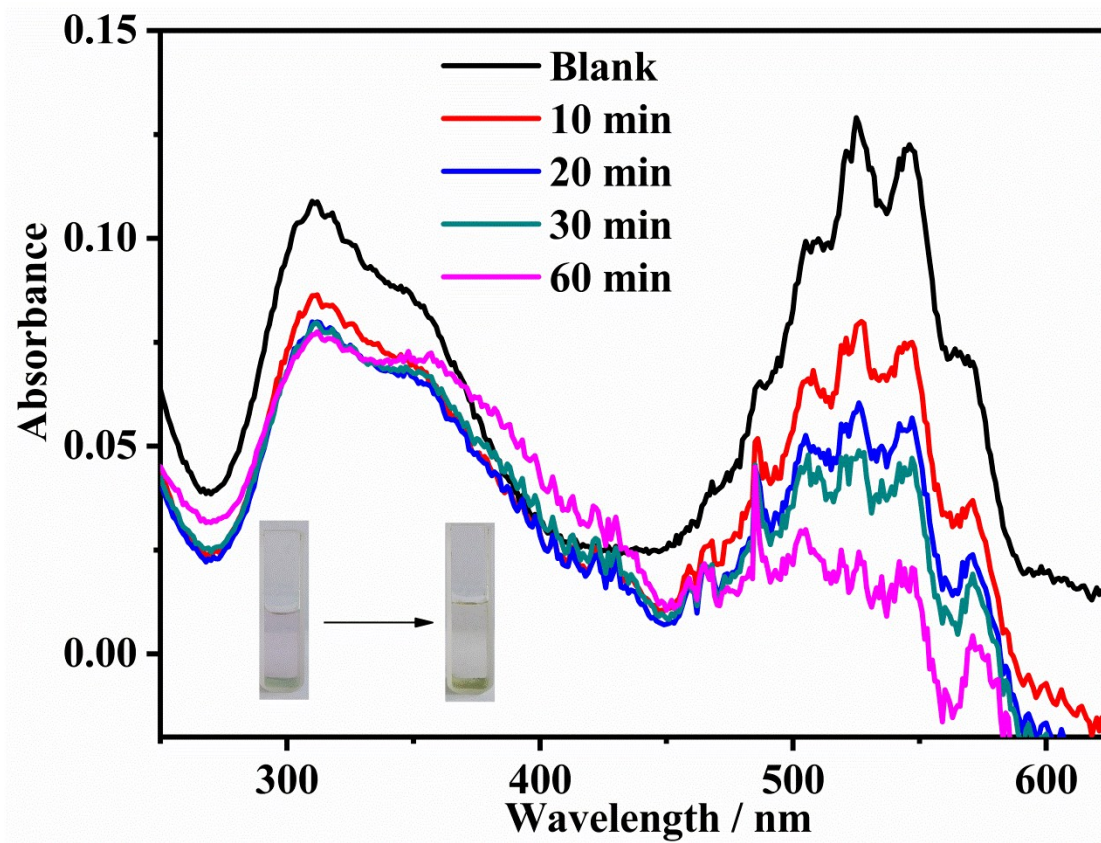

**Figure S4.** UV-vis absorption spectra of the supernatant solution remaining after  $\text{MnO}_4^-$  adsorption at various time intervals.

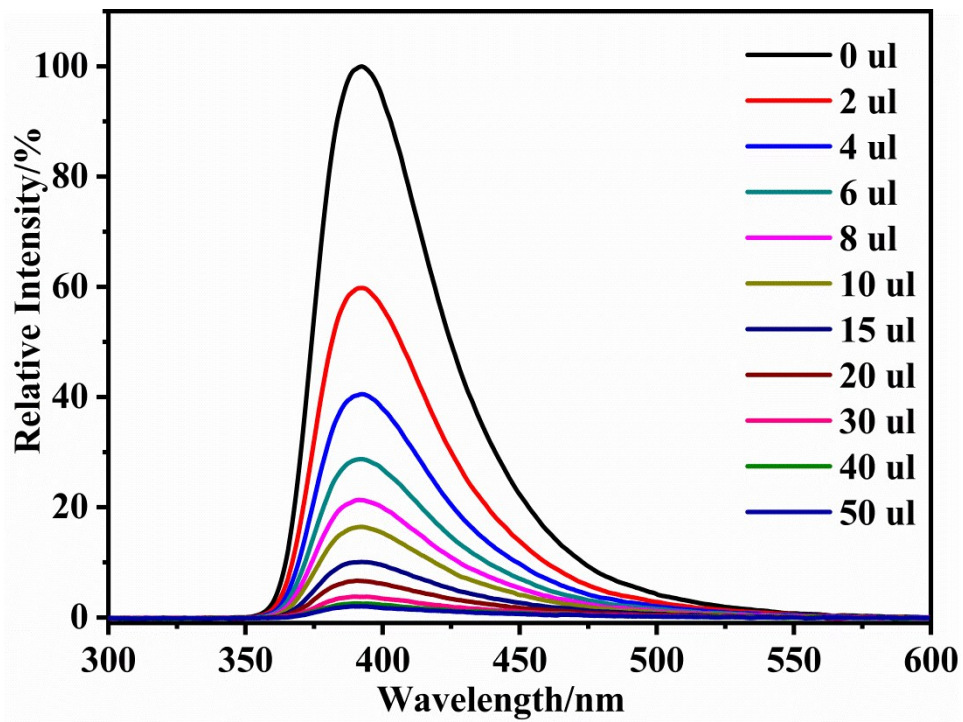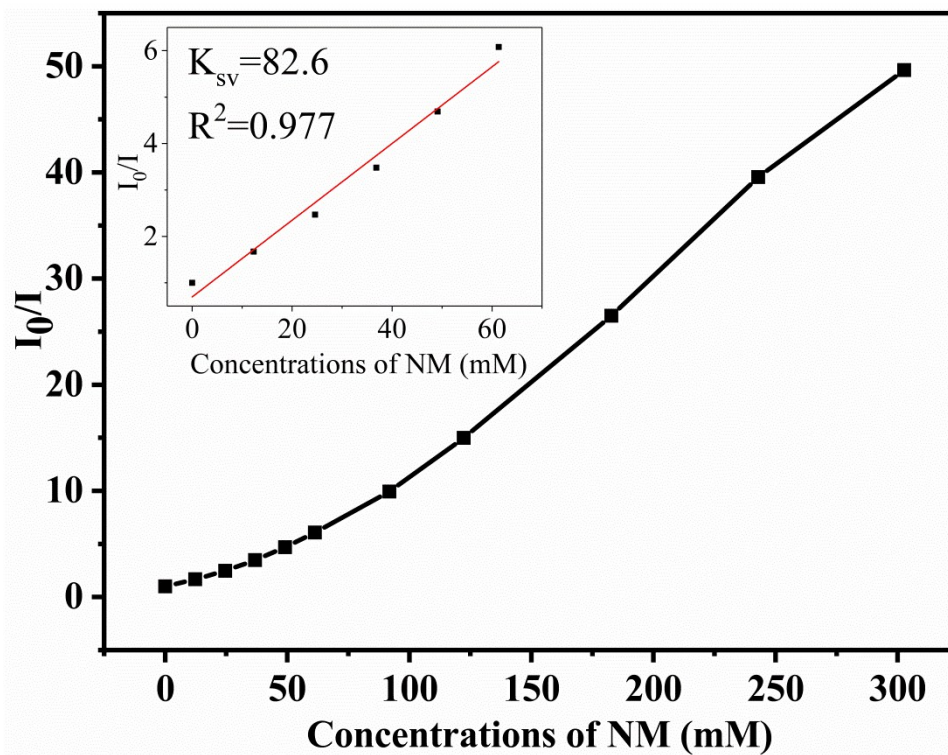

**Figure S5.** (top) Photoluminescence spectra and (bottom) SV curve for suspensions **1** by gradual addition of NM. The inset: the quenching linearity relationship at low concentrations of NM.

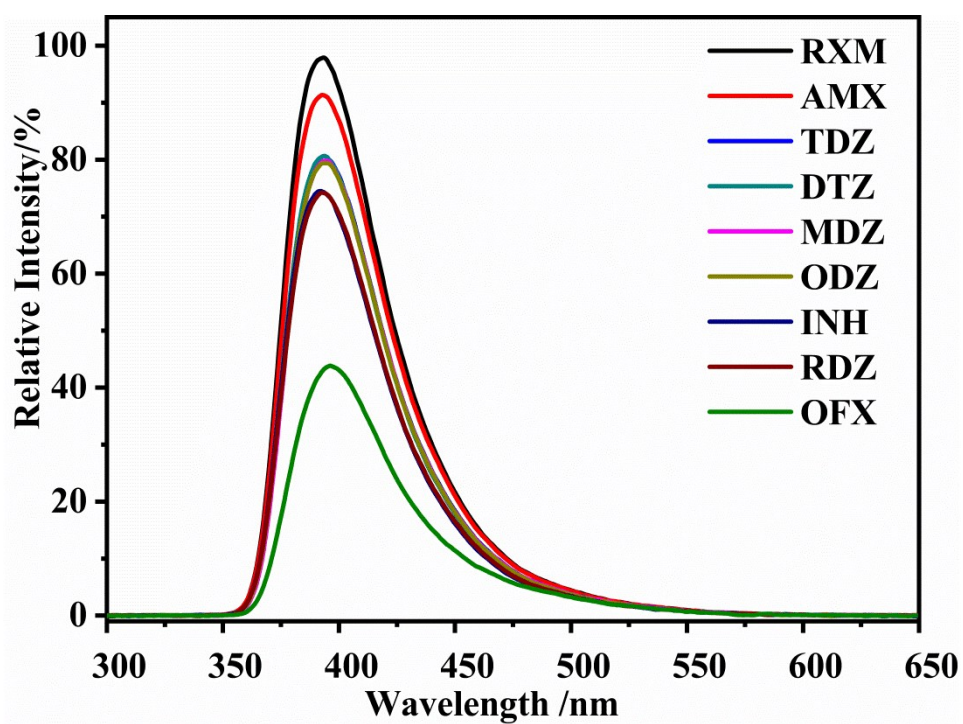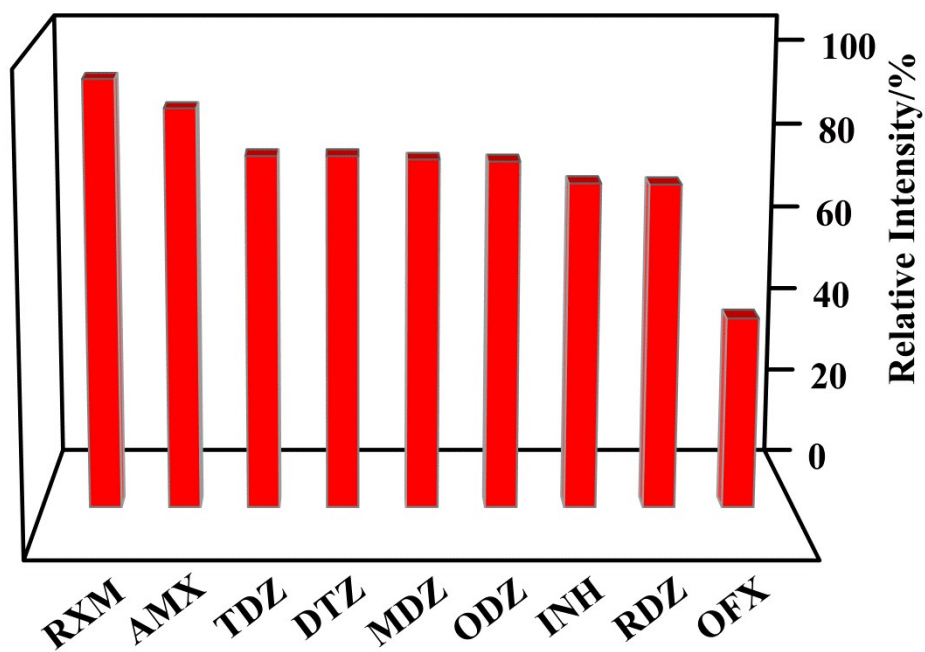

**Figure S6.** (top) Photoluminescence spectra of suspensions **1** introduced into various antibiotics. (bottom) Luminescence intensities after introduced into various antibiotics of suspensions **1**.

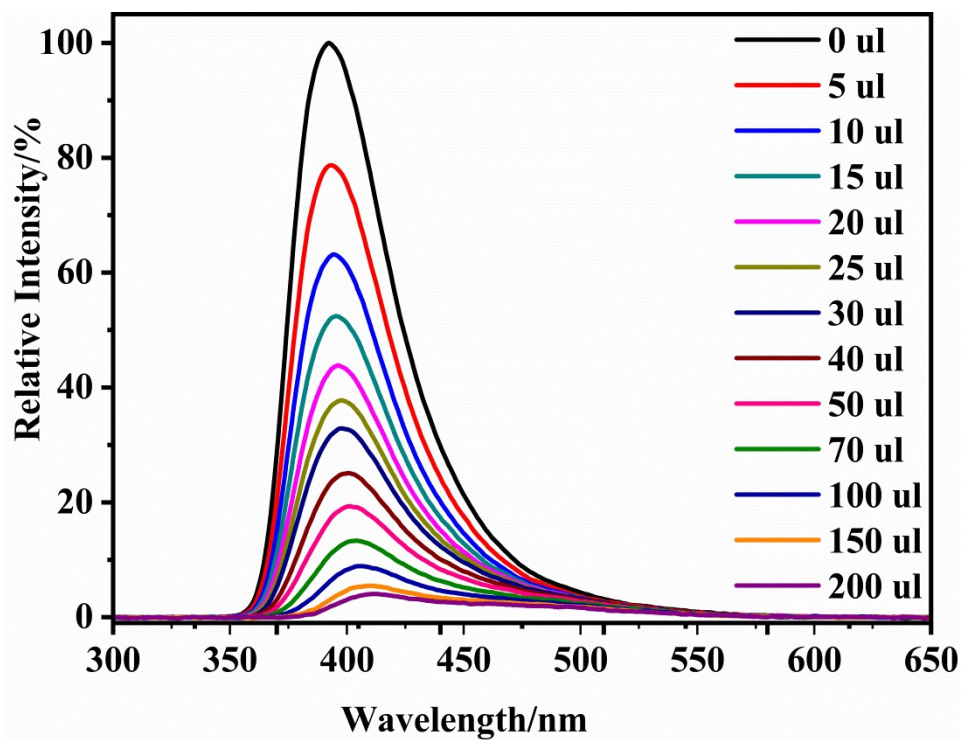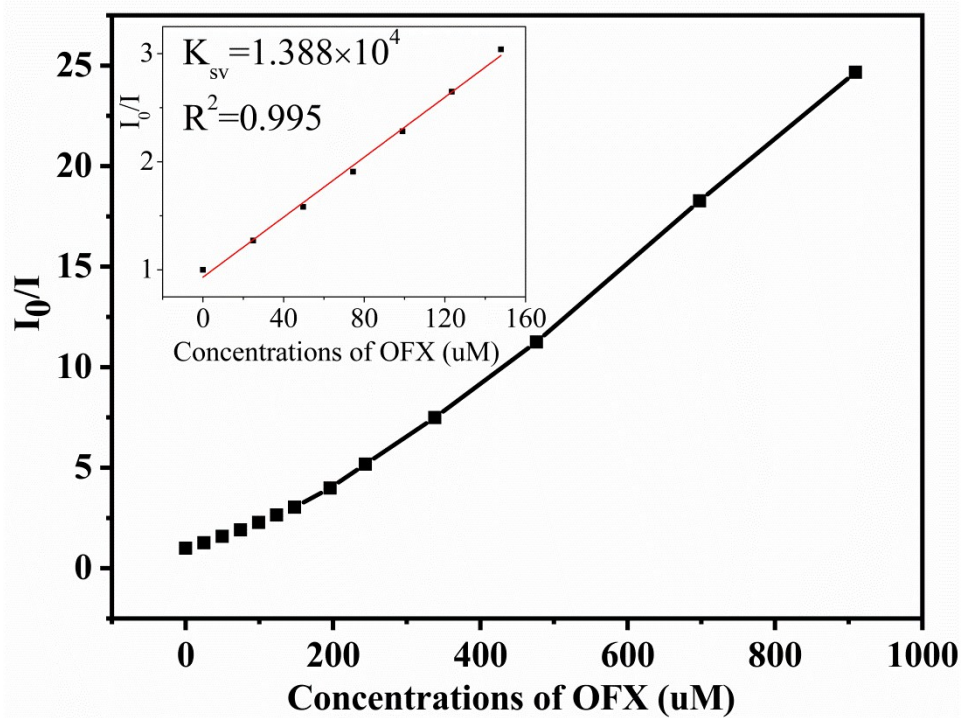

**Figure S7.** (top) Photoluminescence spectra and (bottom) SV curve for compound 1 by gradual addition of OFX. The inset: the quenching linearity relationship at low concentrations of OFX.

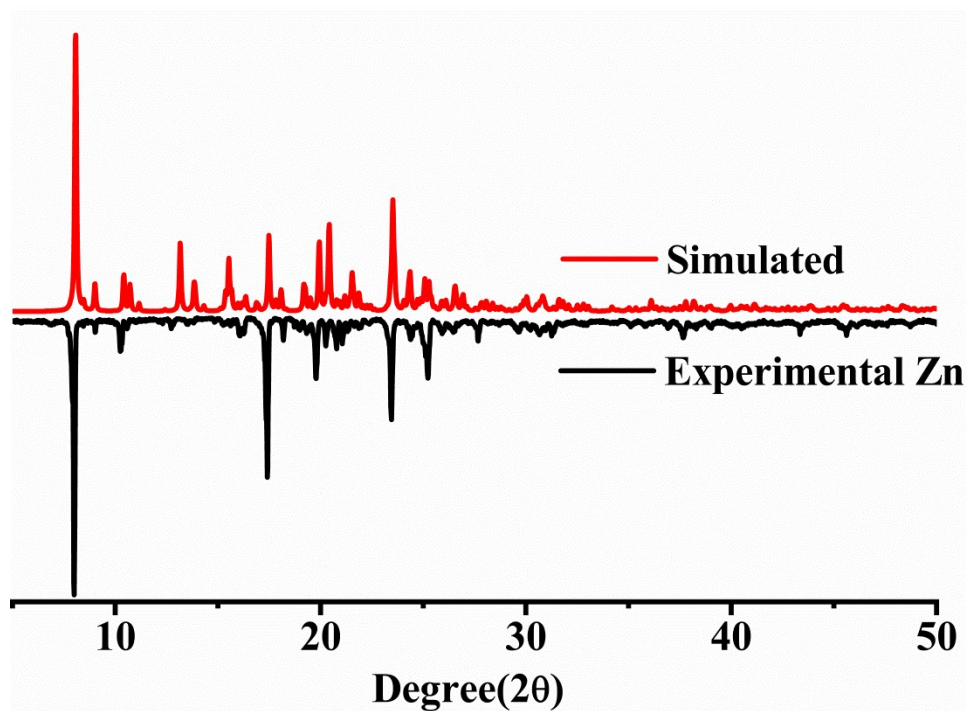

**Figure S8.** Experimental (black) and simulated (red) powder XRD patterns for **1**.

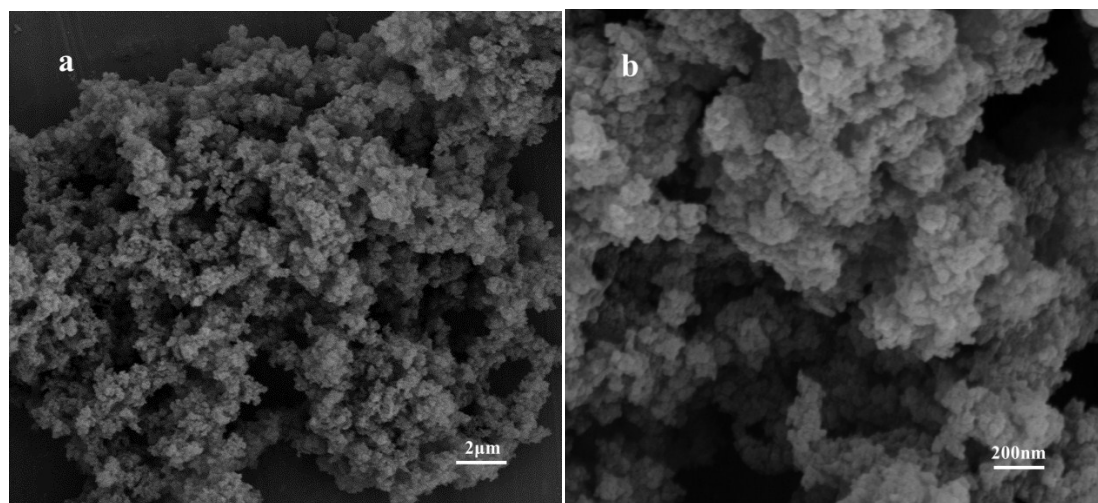

**Figure S9.** SEM images of complex **1** in the scale of 2 μm (a) and zoom in 200 nm (b), respectively.
